# Supplementary material for: Fluorescence probe techniques to study the interaction between hydroxylated polybrominated diphenyl ethers (OH-PBDEs) and protein disulfide isomerase (PDI)
Source: Royal Society of Chemistry journal article supplement (doi:10.1039/c4ay01134a), 2014-01-01
Supplement: c4ay01134a1.pdf [file c4ay01134a1.pdf]

## Supporting Information

1

### 2 **Fluorescence Probe Techniques to Study the Interaction between Hydroxylated** 3 **Polybrominated Diphenyl Ethers (OH-PBDEs) and Protein Disulfide Isomerase** 4 **(PDI)**

5 **Xiaoyan He<sup>a</sup>, Huimin Zhang<sup>a</sup>, Jun Wu<sup>a</sup>, Bin Qiu<sup>a,b\*</sup>, Zhenyu Lin<sup>a</sup>, Guonan**  
6 **Chen<sup>a</sup> and Zongwei Cai<sup>b</sup>**

7

8 Protein disulfide isomerase (PDI) from bovine liver was purchased from  
9 SIGMA (St. Louis, MO). All hydroxylated PBDEs, including 4-OH-2,2',3,4'-  
10 BDE(4-OH-BDE-42), 6-OH-2,2',4,4'-BDE(6-OH-BDE-47), 2-OH-2,4,4'-BDE(2-  
11 OH-BDE-28), 6'-OH-2,2',4,4',5-BDE (6'-OH-BDE-99), 3-OH-2,4,-BDE(3-OH-  
12 BDE-7), were purchased from AccuStandard (New Haven, CT, USA). Bisphenol  
13 A (BPA), 3, 3', 5-triiodo-thyronine (T3), fluorescein isothiocyanate (FITC) were  
14 purchased from Sangon Inc. (Shanghai, China). Other chemicals employed were  
15 analytical reagent grade. Double distilled water (Milli-Q, Millipore, resistance  
16 18.2 M U) was used throughout the experiments. All the OH-PBDEs were  
17 dissolved in acetonitrile. The structures of some chemicals used were listed in Fig.  
18 S1.

19 The fluorescence conjugate F-T3 was synthesized according to the previously  
20 reported method.<sup>s1,s2</sup> Briefly, One volume 20mg/mL FITC was reacted with two  
21 volumes 20mg/mL T3 in a triethylamine / water /pyridine medium (0.1:1.5:9,  
22 v/v/v) for 1 h at room temperature. Crude products were then precipitated with 20  
23 volumes 0.2M ammonium acetate buffer (pH 4.0), and then collected by  
24 centrifugation (10 min, 1000 g). The suspension was discarded and the precipitate  
25 was washed by suspending in 20 volumes distilled water followed by  
26 centrifugation as before. Then the product was redissolved in 8 volumes  
27 NH<sub>4</sub>HCO<sub>3</sub> (0.05M), if necessary, a small amount of ammonia solution will help.  
28 Then aliquots (0.5mL) were applied to a Sephadex G-75 column (3×30cm)  
29 equilibrated with NH<sub>4</sub>HCO<sub>3</sub> (0.05M, pH 8.5). The impurities were removed from

30 the column by passing  $\text{NH}_4\text{HCO}_3$  (0.05M), and the desired labeled T3 product was  
31 then eluted from the column with distilled water and either freeze-dried to a  
32 yellow powder or stored frozen(-20°C)

33 The reaction was conducted in Tris-NaCl buffer (50mM Tris-HCl/100mM  
34 NaCl, pH7.4). The concentration of F-T3 was determined by measuring the  
35 absorbance at 490nm with  $7.8 \times 10^4 \text{M}^{-1} \text{cm}^{-1}$ , the molar extinction coefficient.

36 All fluorescence measurements were carried out using a FLS 920 Steady State  
37 and Time Resolved Fluorescence Spectrophotometer (Edinburgh Instruments,  
38 UK). Different volumes of F-T3 were reacted with different volumes of PDI, for  
39 finally required concentration. After incubation for 30 min at 4 °C, the solution  
40 was transferred into a quartz micro-cuvette, and the fluorescence emission  
41 spectrum of each solution was recorded at room temperature. A control sample  
42 without PDI was also recorded. The excitation wavelength was 490 for F-T3, and  
43 the intensity at 516 nm was plotted.

44 The competitive binding assay was used to study the binding reaction  
45 between PDI and OH-PBDEs. For the assay, 200 nM F-T3 and 5 nM PDI were  
46 mixed in a total volume of 190  $\mu\text{L}$  and reacted for 30 min at 4 °C. Then, 10  $\mu\text{L}$   
47 of different concentrations of OH-PBDEs were added and incubated for 10min.  
48 The fluorescence intensity at 516nm before and after OH-PBDEs addition was  
49 measured. The content of acetonitrile in the final solution was kept below 1.2% to  
50 avoid solvent effect.

51 Circular dichroism spectroscopy is widely used in the determination of protein  
52 secondary structure and also a powerful tool to study protein-ligand binding  
53 interaction. Protein conformational changes are often caused by ligand binding and  
54 accompanied by changes in CD spectrum. As shown in Figure S4, with the addition of  
55 200nM T3 into 200nM PDI, the sharp positive peak at 195nm obviously increased  
56 which is probably due to the absorbance of the small molecules in that area, while the  
57 negative peak at 210-220nm remained unchanged. The same result can be obtained by  
58 adding F-T3 in place of T3, suggesting that the protein is folded and the binding does

59 not affect the protein structure.

60

61 References

62 S1. D. S. Smith, FEBS Lett., 1977, 77, 25-27.

63 S2. X. M. Ren and L. H. Guo, Environ. Sci. Technol., 2012, 46, 4633-4640.

64

65

66 **Fig.S1**

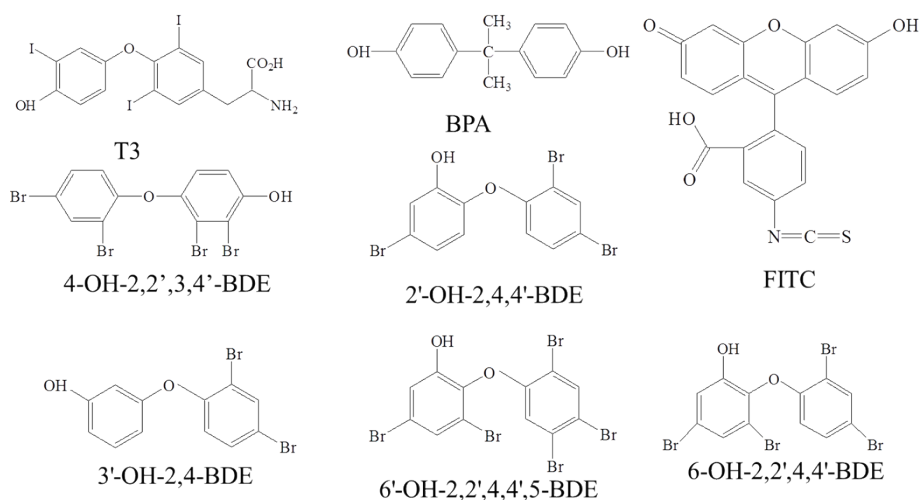

67

68 Fig. S1 Structures of the compounds used in the assay.

69

70

71 **Fig.S2**

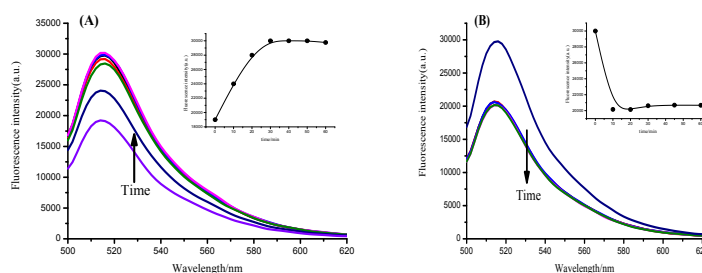

72

73 Fig. S2 The influence of different incubation time to direct binding assay between

74 PDI and F-T3. (B) The influence of different incubation time to competitive binding

75 assay of OH-PBDEs

76

77 **Fig.S3**

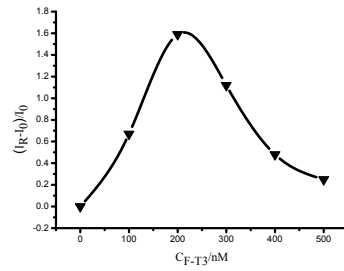

78

79 Fig. S3 Fluorescence intensity ratio at different F-T3 concentrations, using a fix PDI

80 5nM.

81

82 **Fig.S4**

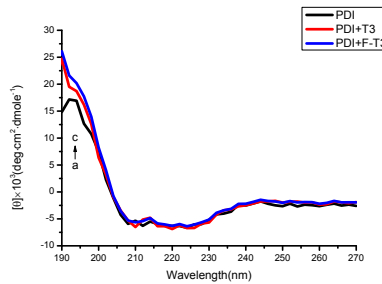

83

84 Fig.S4 Circular dichroism spectra of (a)PDI, (b)PDI+T3, (c)PDI+F-T3.

85

86

87 **Fig.S5**

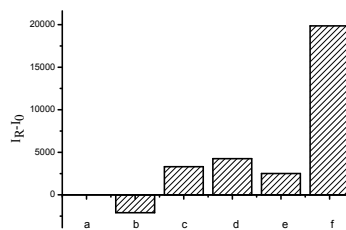

88

89 Fig. S5 Selectivity for F-T3 combined with PDI and other enzymes. (a)F-T3; (b)F-

90 T3+1.0×10<sup>-6</sup> mol L<sup>-1</sup> Invertase; (c)F-T3+1.0×10<sup>-6</sup> mol L<sup>-1</sup> Pyrophosphatase; (d)F-

91 T3+5.0×10<sup>-7</sup> mol L<sup>-1</sup> Platelet-Derived Growth Factor(PDGF); (e)F-T3+5.0×10<sup>-7</sup> mol

92 L-1 Thrombin; (f)F-T3+5.0×10<sup>-9</sup> mol L-1 PDI.

93

94

95 **Fig.S6**

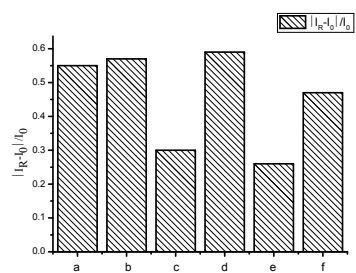

96

97 Fig. S6 The comparison of different targets (a)4-OH-BDE-42, (b)BPA (c)6-OH-BDE-

98 47, (d)2-OH-BDE-28, (e)6'-OH-BDE-99 (f)3-OH-BDE-7.

99
